# Supplementary material for: Skin regeneration underlies cancer resistance in Acomys
Source: Research Square preprint supplement (doi:10.21203/rs.3.rs-5160289/v1), 2024-11-04
Supplement: Supplementary file 1 [file 03c262d68f907a13c0ed9542.pdf]

1    **Supplementary Figure 1**

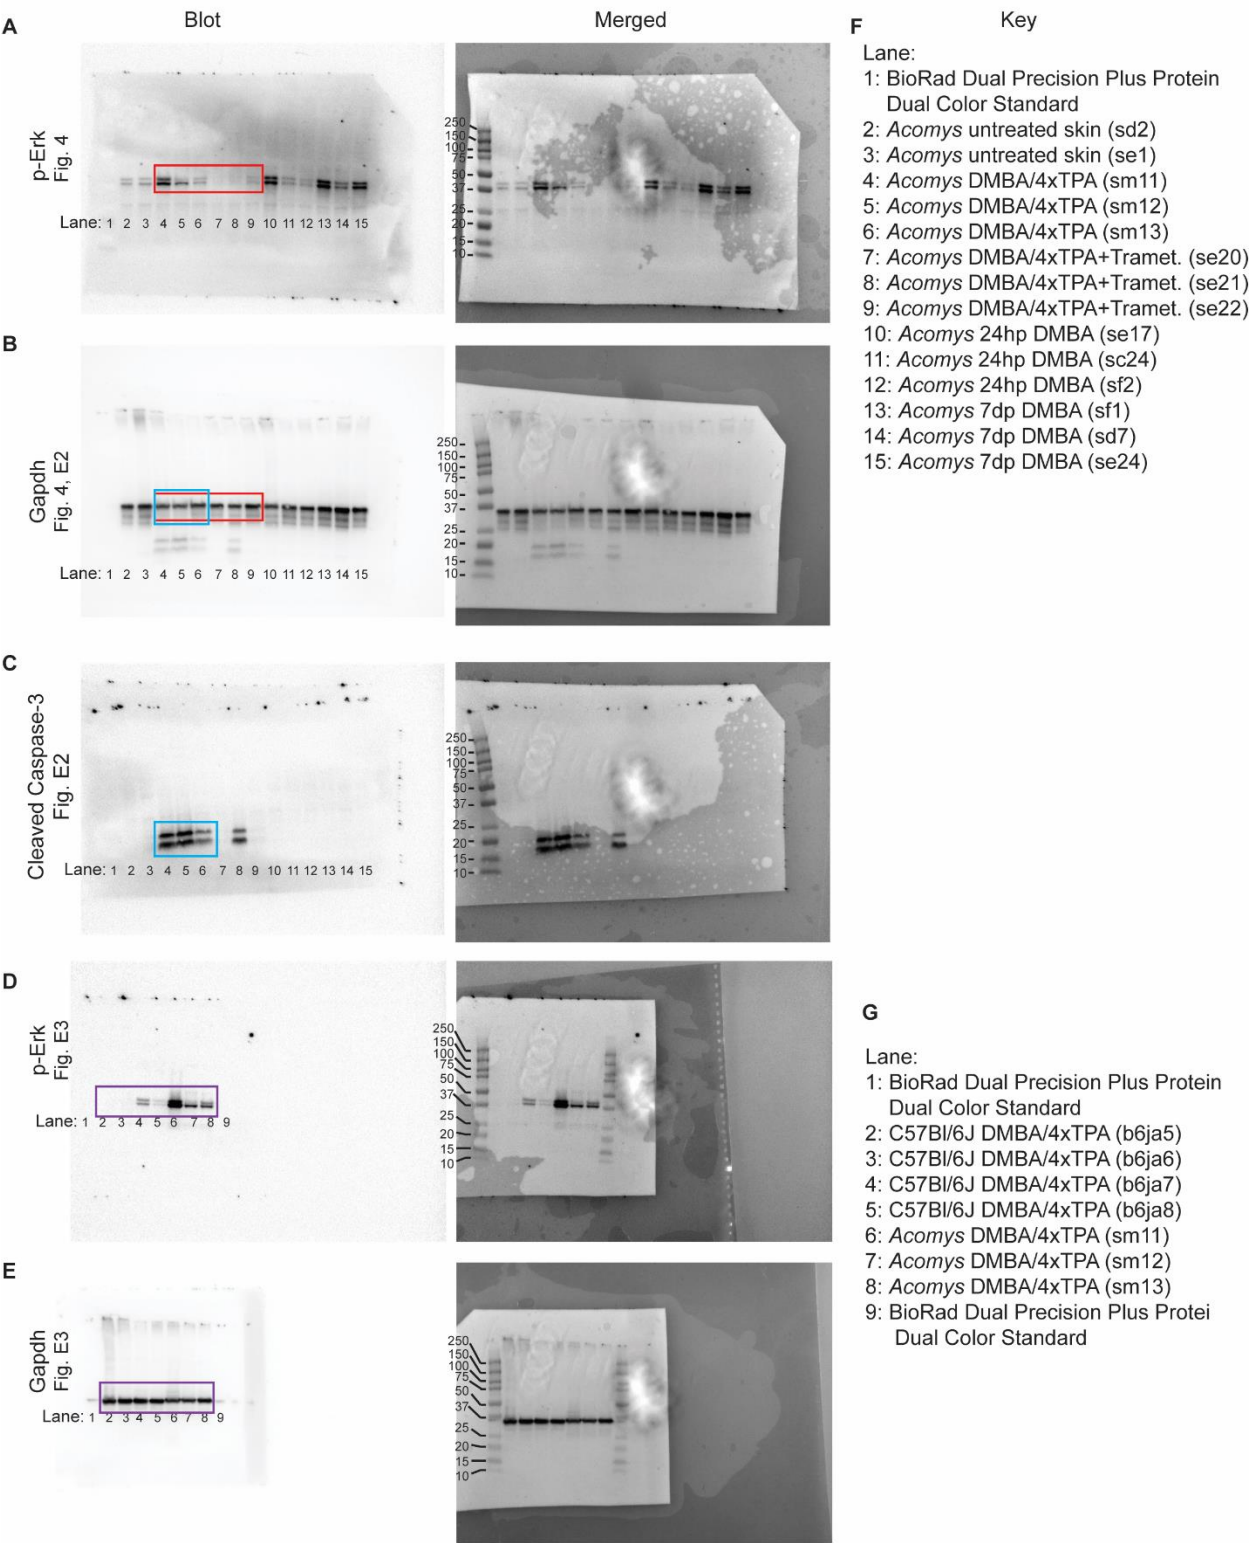

2

3

#### Supplementary Figure 1 Legend – Raw Western Blot Data

(A) p-Erk blot used in Figure 4B. Lanes 4-9 selected in red were isolated to generate the final figure. The left-hand blot panel is merged with the molecular weight marker ranging from 10 to 250kDa (labeled). Each lane represents a unique biological sample, as described in (F). (B) Gapdh blot used to generate Figure 4B and Extended Data Figure 2B. Lanes 4-9 (selected in red) were isolated for Figure 4B, while lanes 4-6 (selected in blue) were isolated for Extended Data Figure 2B. (C) Cleaved Caspase-3 blot used to generate Extended Data Figure 2B. Lanes 4-6 (selected in blue) were isolated for the final figure. After imaging, this blot was stripped and re-probed for Gapdh shown in panel (B). The blots shown in (A-C) were run simultaneously with equal amounts of protein loaded per sample. Due to the similarities in size between p-Erk and Gapdh, they were run on different gels for the same experiment for accurate quantification. Residual cleaved Caspase-3 bands can be seen after stripping in (B). (D) p-Erk blot used to generate Extended Data Figure 3. Lanes 2-8 (selected in purple) were used. Each lane represents a unique biological sample as described in (G). (E) Gapdh blot used to generate Extended Data Figure 3. Due to similarities in size of p-Erk and Gapdh and potential for inefficient membrane stripping, Gapdh was probed on a second membrane run simultaneously with that shown in (D) with equal amounts of protein loaded per well. (F) Lane key for (A-C). The experimental group as well as individual sample identifier is included. (G) Lane key for (D-E). The experimental group as well as individual sample identifier is included.
